# Supplementary material for: ABA Receptor Subfamily III Enhances Abscisic Acid Sensitivity and Improves the Drought Tolerance of Arabidopsis
Source: Int J Mol Sci. 2018 Jul 2;19(7):1938. doi: 10.3390/ijms19071938 (PMC6073838; doi:10.3390/ijms19071938)
Supplement: Supplementary file 1 [file ijms-19-01938-s001.pdf]

# ABA Receptors Subfamily III Enhances Absciscic Acid Sensitivity and Improves Drought Tolerance of Arabidopsis

## Methods

### *In vitro* PP2C Phosphatase Assay

RCAR3 and RCAR11-RCAR14 were cloned into the pET28a expression vector with 6 × His tag fused at the C-terminal side and the primers were used as shown in table S1. ABI1 (residues 117-434) was cloned into pGEX-6p-1 expression vector and transformed into *E. coli* strain *Rosetta* (DE3). All proteins were purified as described previously (Zhang *et. al.*, 2018).

Reactions were performed in a 5× reaction buffer containing 250 mM imidazole, pH 7.2, 1 mM EGTA, 25 mM MgCl<sub>2</sub>, 0.1% β-mercaptoethanol and 0.5 mg/ml BSA. 0.3 μM ABI1 (residues 117-434), 3 μM RCARs proteins and 10 μM (+)-ABA (Sangon Biotech, Shanghai, China) were added if required. After incubation with peptide substrate (RRA(pT)VA) at 30 °C for 20 min, the reaction was stopped by addition of 50 μL molybdate dye. Absorbance at 630 nm was measured after 20 min at room temperature. The values shown were normalized to the control (ABI1) as 100% activity.

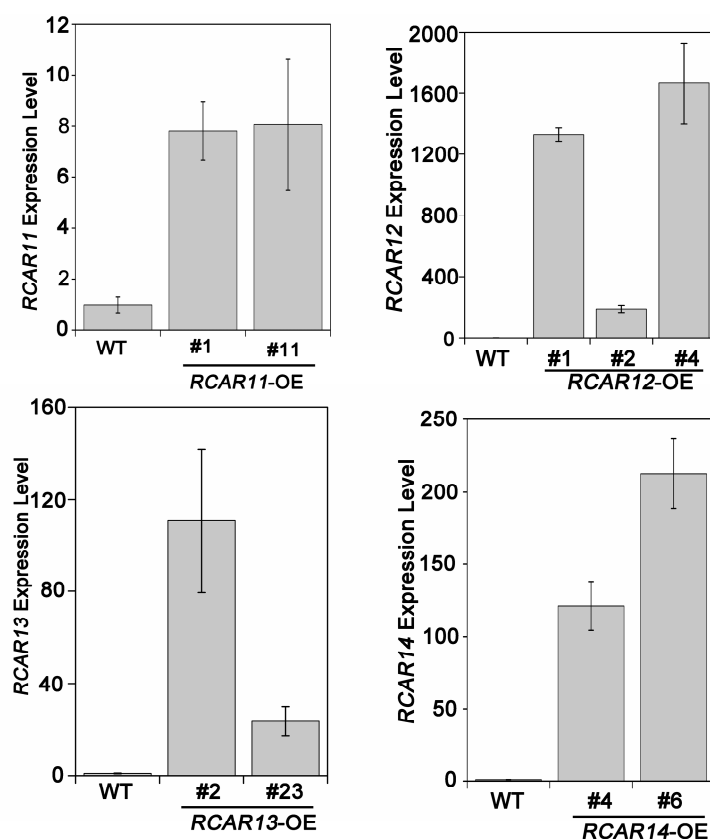

**Figure S1.** Quantitative RT-PCR analysis of *RCAR11-RCAR14* gene expression in overexpression transgenic lines. Expression level in wild-type Col-0 (WT) and all the genetic materials was normalized to that of *ACTIN2/8* and the expression levels of *RCAR11-RCAR14* in WT were set to 1. Each value is the mean ± SE of the three independent biological experiments.

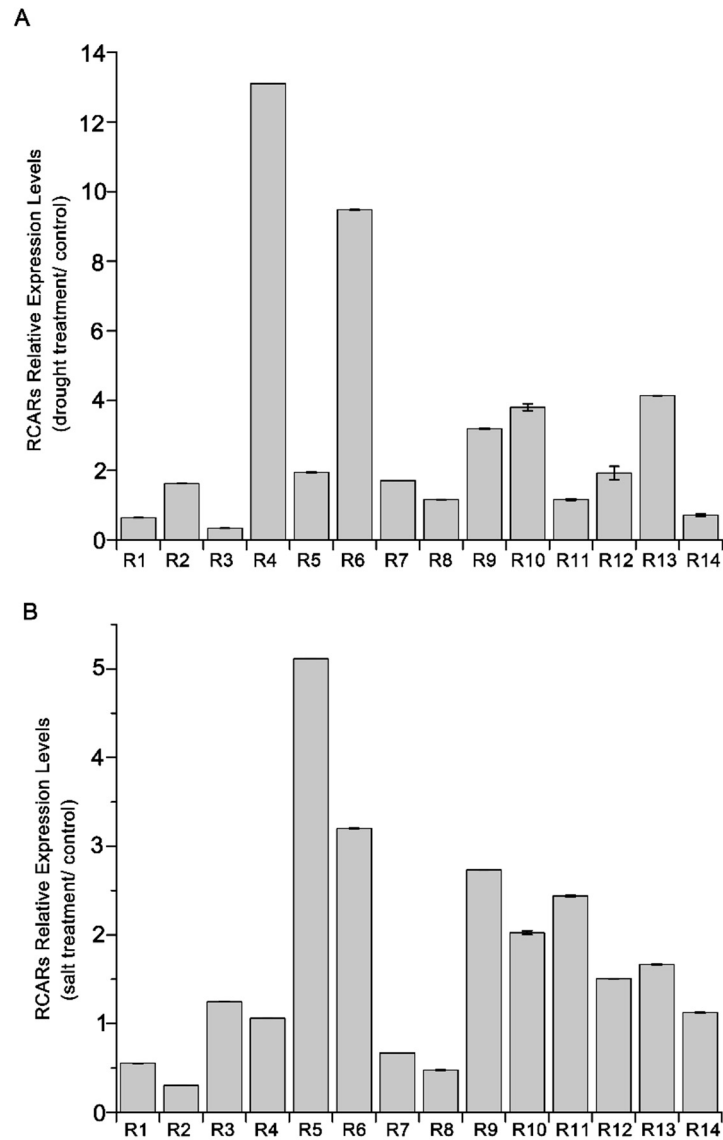

**Figure S2.** The quantitative RT-PCR of RCARs (R1-R14) genes. **A.** Two-week-old the wild type plants were detached and the total RNA was isolated at 0 and 1 h. **B.** One-week-old the wild type plants were treated with 150 mM NaCl and the total RNA was isolated at 0 and 6 h, respectively. *ACTIN2/8* was used as an internal control. Each value is the mean  $\pm$  SE of the three independent biological experiments.

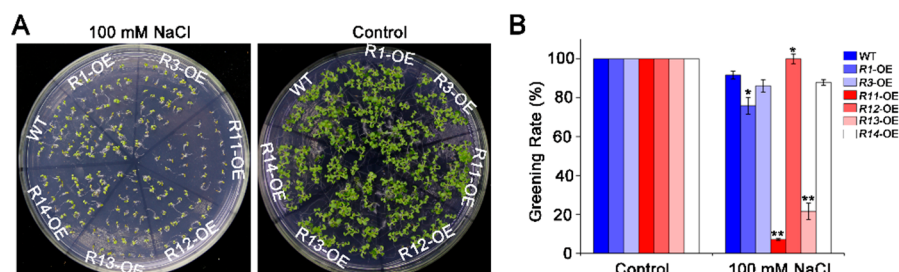

**Figure S3.** Effect of RCARs responding to salt during early seedling development. **A.** Growth status of the transgenic seedlings and wild type grown on MS medium with and without 100 mM NaCl for 5 days and 7 days, respectively. **B.** Statistical analysis of cotyledon greening rate of seedlings grown on MS medium with and without 100 mM NaCl for 5 days and 7 days, respectively.

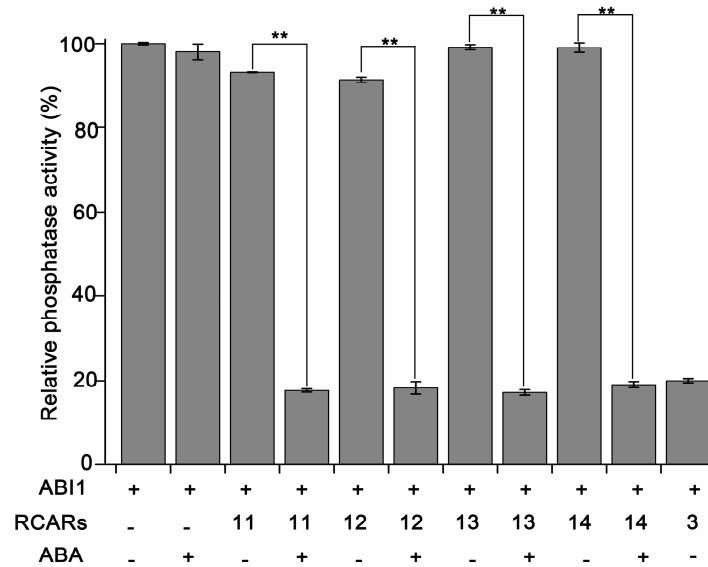

**Figure S4.** Effects of various phosphorylation forms of RCARs on the inhibition of ABI1 activity in the absence or presence of ABA. The concentrations of each protein component were 0.3  $\mu$ M for ABI1, 3  $\mu$ M for WT and phosphor-mutants of RCARs, and 10  $\mu$ M (+)-ABA. Error bars represent SD (n=3). \*\*P < 0.01, Student's t-test.

**Table S1.** Primers for transgenic plant construction and RT-PCR analysis.

|                                           | Genes  | Primer sequences (5'-3')                                                                            |
|-------------------------------------------|--------|-----------------------------------------------------------------------------------------------------|
| Primers for transgenic plant construction | RCAR11 | F ( <i>Bam</i> HI): CGGGATCCATGCCTTCGGAGTTAACACCA<br>R ( <i>Sac</i> I): CGAGCTCCGTCACCTGAGAACCACCT  |
|                                           | RCAR12 | F ( <i>Bam</i> HI): CGCGGATCCATGGCGAATTCAGAGTCCTC<br>R ( <i>Sac</i> I): CGAGCTCCCTAACCTGAGAAGAGTTGT |
|                                           | RCAR13 | F ( <i>Bam</i> HI): CGGGATCCATGAATCTTGCTCCAATCCA<br>R ( <i>Sac</i> I): CGAGCTCGGTCTGGAGAAGCC        |
|                                           | RCAR14 | F ( <i>Bam</i> HI): CGGGATCCATGAGCTCATCCCCGG<br>R ( <i>Sac</i> I): CGAGCTCTTCATCATCATGCATAGGTG      |
|                                           | RCAR12 | F ( <i>Sac</i> I): CGAGCTCATGGCGAATTCAGAGTCCTC<br>R ( <i>Xho</i> I): CCGCTCGAGCCTAACCTGAGAAGAGTTGT  |
| Primers for PP2C phosphatase assay        | RCAR13 | F ( <i>Sac</i> I): CGAGCTCATGAATCTTGCTCCAATCCA<br>R ( <i>Xho</i> I): CCGCTCGAGGGTCTGGAGAAGCC        |
|                                           | RCAR14 | F ( <i>Bam</i> HI): CGGGATCCATGAGCTCATCCCCGG<br>R ( <i>Xho</i> I): CCGCTCGAGTTCATCATCATGCATAGGTG    |
|                                           | RCAR1  | AAGGCGGCACGGCGAT<br>ACGGTTTGTATTTCTGCGG                                                             |
| Primers for RT-PCR                        | RCAR2  | CACTGGTGCGGAGATTG<br>GATGTTGATACCGAGGATGT                                                           |
|                                           | RCAR3  | GGGATTGAGAACTTGACGA<br>AAACGGCTTATACTTCTGTG                                                         |
|                                           | RCAR4  | CGGAGACGATAGACGGA<br>GACGCTCGGTAACATCTG                                                             |
|                                           | RCAR5  | TTCCAGCGGAGTTCAGC<br>CCGGCACATCCACCAC                                                               |
|                                           | RCAR6  | CGATCTTCCGGCGAGTTT<br>AGTATTTCTTCCGGCACAT                                                           |
|                                           | RCAR7  | TAGCGTAGTCGAGACCATT<br>GGGAAGCCGGAGACTAA                                                            |
|                                           | RCAR8  | CGCGGTATGCATGTCCC<br>ACGATACGGCACTGTCTG                                                             |

|          |                          |
|----------|--------------------------|
| RCAR9    | TATCCCCACCACCATCAG       |
|          | AGCGGCTTAGGATCGAC        |
| RCAR10   | GCTCCGCCGTTATTCAAG       |
|          | GCTAGCGGCGGGGAG          |
| RCAR11   | ATCGTCATCAGTGGATTA       |
|          | TAATTCGTCAGCCTATGT       |
| RCAR12   | TGCTGATACGGTTATTAGATTGA  |
|          | GAGAAGAGTTGTTGTTGTTGTT   |
| RCAR13   | GTGTATAGTGTGGTATTGG      |
|          | GCGAGATTCTGTAGATTTC      |
| RCAR14   | GTCGGTCAATGAGTTCTT       |
|          | TAGTGTCTTCCTCTGTGTT      |
| RD22     | AGGAGCAAACCCTTTCGTGT     |
|          | CGTTTCAACGTCTCCGAAAA     |
| Actin2/8 | AAGATCAAGGAGAAGTTGCCAGG  |
|          | GTAAACAACACACATCGCAGGACG |
| RAB18    | AAGATCAAGGAGAAGTTGCCAGG  |
|          | GTAAACAACACACATCGCAGGACG |

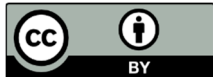

© 2018 by the authors. Submitted for possible open access publication under the terms and conditions of the Creative Commons Attribution (CC BY) license (<http://creativecommons.org/licenses/by/4.0/>).
